# Supplementary material
Source: PubMed Central journal article supplement (PMC6168359)

Supplemental Figure S1

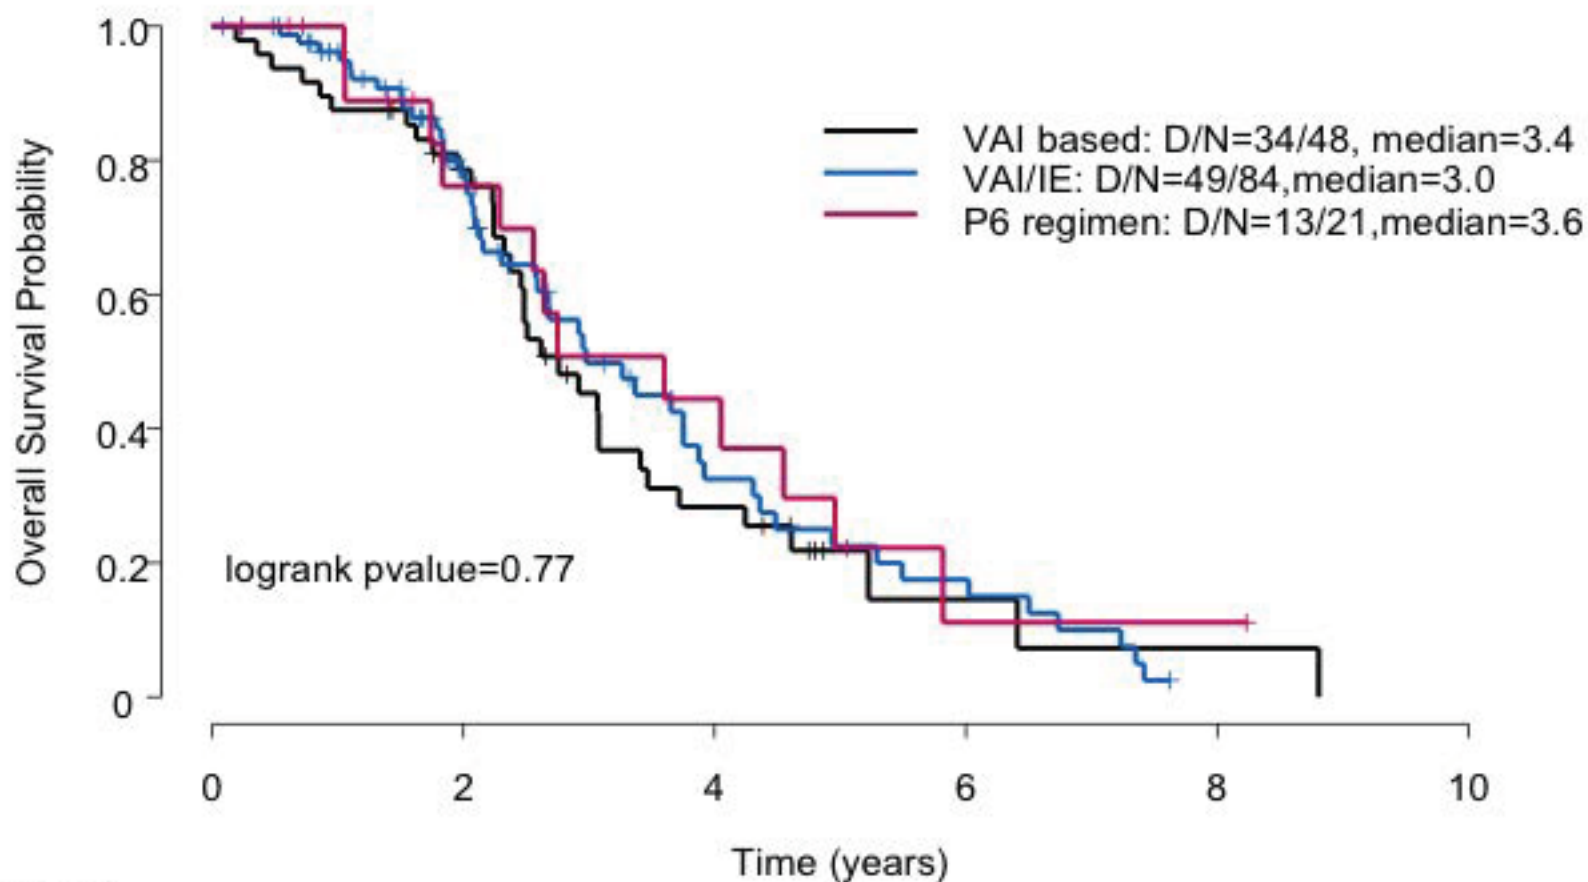

| No. at Risk | 0  | 2  | 4  | 6 | 8 | 10 |
|-------------|----|----|----|---|---|----|
| VAI based   | 48 | 32 | 10 | 2 | 1 | 0  |
| VAI/IE      | 84 | 47 | 13 | 7 | 0 | 0  |
| P6 regimen  | 21 | 12 | 6  | 1 | 1 | 0  |

Supplement: NIHMS973851-supplement-2.pdf [file NIHMS973851-supplement-2.pdf]

## Supplemental Figure S2

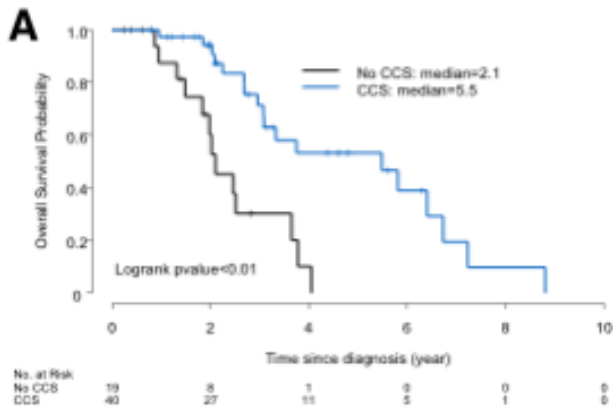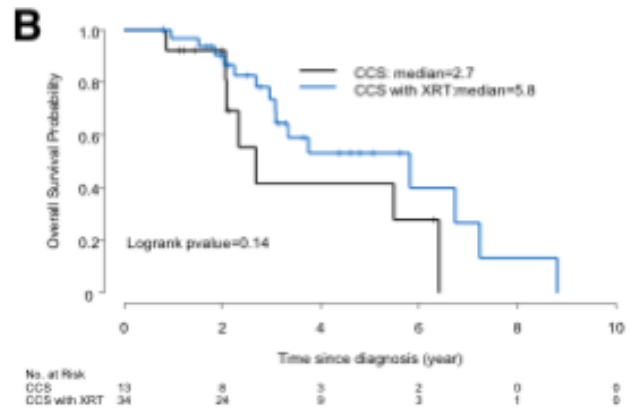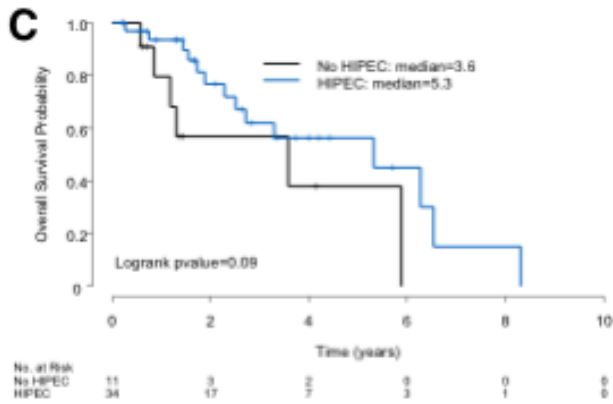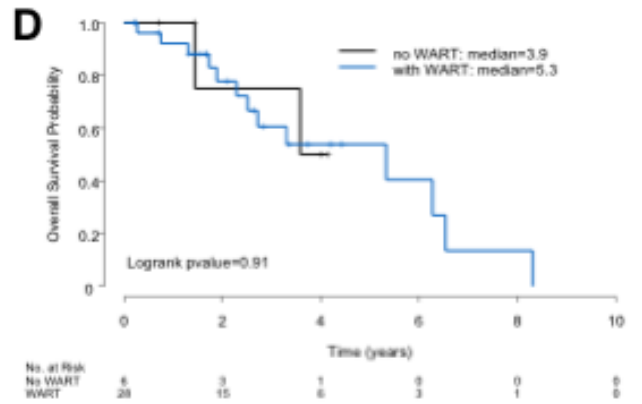

Supplement: NIHMS973851-supplement-3.pdf [file NIHMS973851-supplement-3.pdf]

### Supplemental Figure S3

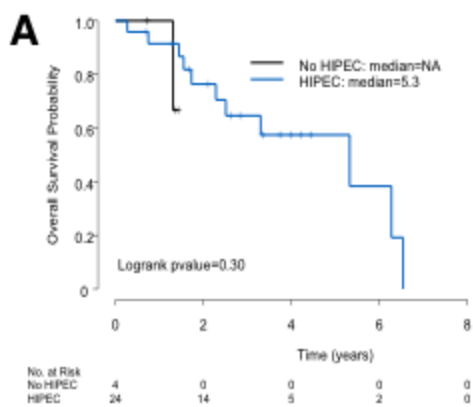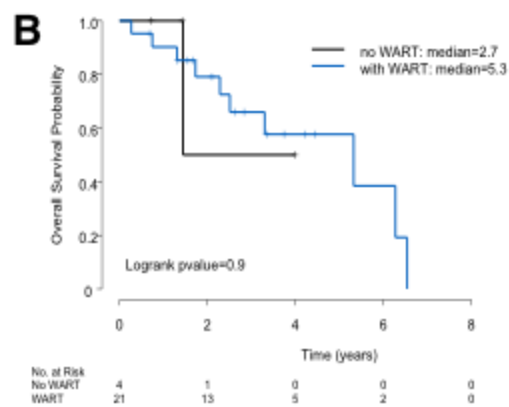

Supplement: NIHMS973851-supplement-4.pdf [file NIHMS973851-supplement-4.pdf]

Supplemental Figure S4

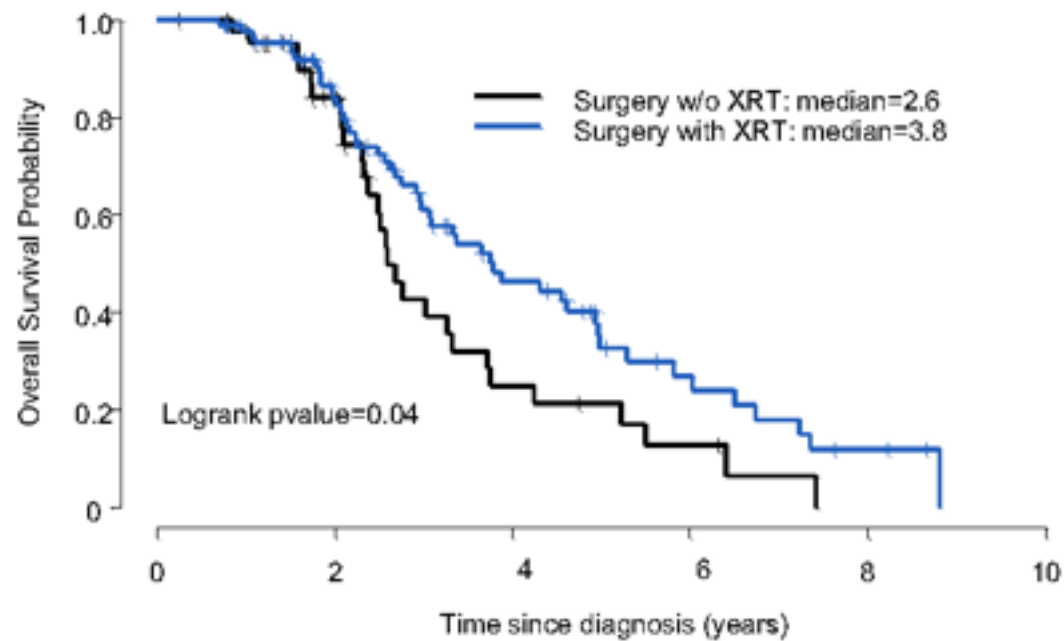

| No. at Risk      | 0  | 2  | 4  | 6 | 8 | 10 |
|------------------|----|----|----|---|---|----|
| Surgery w/o XRT  | 44 | 27 | 7  | 3 | 0 | 0  |
| Surgery with XRT | 92 | 61 | 24 | 9 | 3 | 0  |

Supplement: NIHMS973851-supplement-5.pdf [file NIHMS973851-supplement-5.pdf]
